# Supplementary material
Source: Springer Nature journal article supplement (https://www.springermedizin.de/resource/supplementary/12982_2013_113_MOESM2_ESM.pdf/9604216)

A

Adj(-A<sub>1</sub>) =

|                | I <sub>S</sub> | I <sub>C</sub> | I <sub>D</sub> |
|----------------|----------------|----------------|----------------|
| I <sub>S</sub> | 1              | -1             | 1              |
| I <sub>C</sub> | 1              | 1              | 1              |
| I <sub>D</sub> | -1             | -1             | 1              |

B

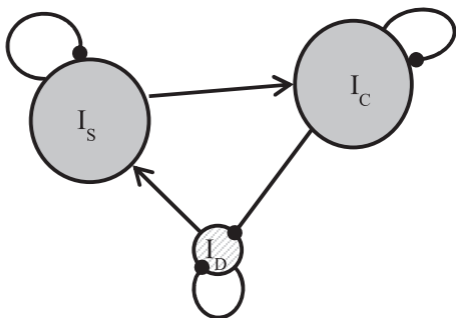

C

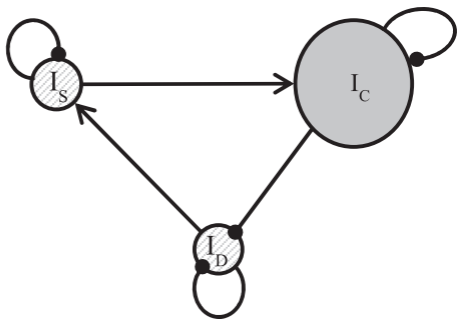

Supplement: MOESM2 [file 9604216]
